# Supplementary material for: Diffusion Weighted Imaging in the Assessment of Tumor Grade in Endometrial Cancer Based on Intravoxel Incoherent Motion MRI
Source: MDPI journal article supplement (doi:10.3390/diagnostics12030692), 2022-03-12
Supplement: s1 [file s1]

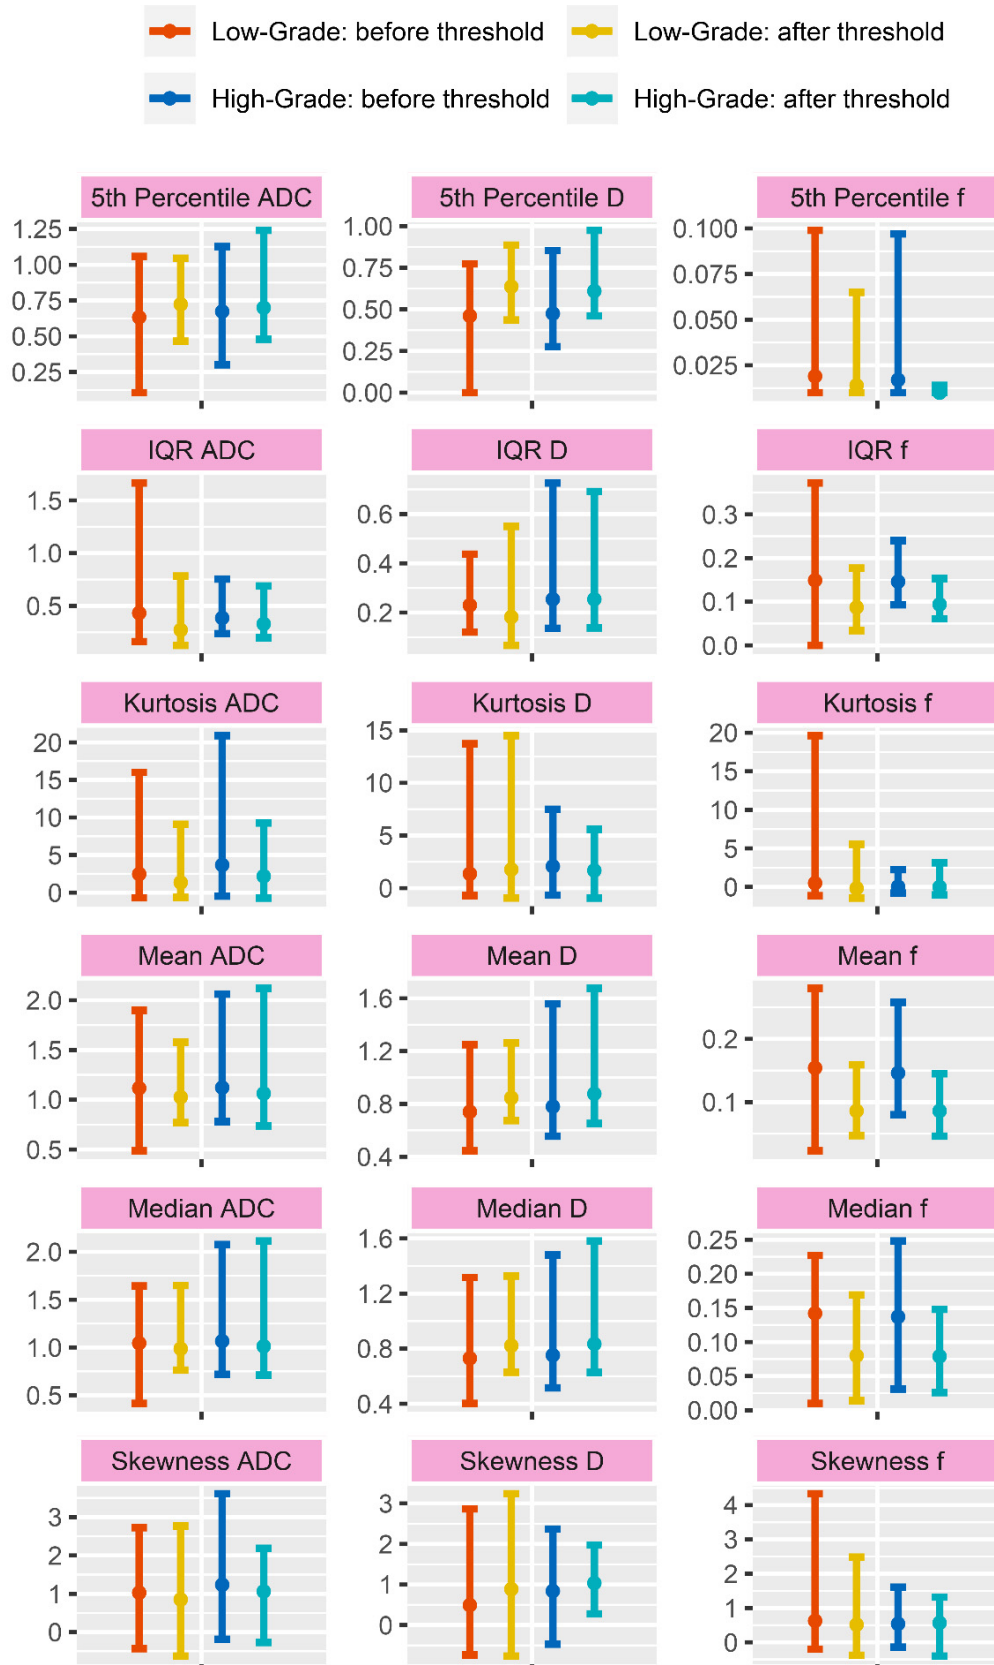

**Figure S1.** An illustrative representation of the mean (dots in the line), min (bottom of the line), and max (upper part of the line) of all parametric maps histogram metrics: i) before and after applying the bias corrected adjusted R-squared (adj-R<sup>2</sup>) thresholding of 0.7, and ii) in low and high grade patients.

**Table S1.** Comparative analysis results of all parametric maps histogram metrics when calculated before and after applying the bias corrected adjusted R-squared (adj-R<sup>2</sup>) thresholding of 0.7. All metrics are expressed as mean [min max]. No statistical difference between before and after thresholding related values is displayed in bold. ADC: apparent diffusion coefficient; D: diffusion coefficient; f: micro-perfusion fraction; IQR: interquartile range.

| Histogram Metric                                                 | Low-grade (n=35)            |                              |         | High-grade (n=17)           |                              |         |
|------------------------------------------------------------------|-----------------------------|------------------------------|---------|-----------------------------|------------------------------|---------|
|                                                                  | Before threshold            | After threshold              | p-value | Before threshold            | After threshold              | p-value |
| Whole-tumor ADC histogram (x10 <sup>-3</sup> mm <sup>2</sup> /s) |                             |                              |         |                             |                              |         |
| 5 <sup>th</sup> percentile                                       | <b>0.633 [0.106 1.058]</b>  | <b>0.724 [0.466 1.045]</b>   | >0.05   | <b>0.673 [0.301 1.127]</b>  | <b>0.700 [0.479 1.241]</b>   | >0.05   |
| mean                                                             | <b>1.116 [0.487 1.899]</b>  | <b>1.026 [0.770 1.577]</b>   | >0.05   | <b>1.122 [0.780 2.061]</b>  | <b>1.063 [0.736 2.119]</b>   | >0.05   |
| median                                                           | <b>1.045 [0.414 1.643]</b>  | <b>0.987 [0.763 1.648]</b>   | >0.05   | <b>1.065 [0.718 2.076]</b>  | <b>1.013 [0.710 2.113]</b>   | >0.05   |
| skewness                                                         | <b>1.028 [-0.431 2.725]</b> | <b>0.851 [-0.627 2.768]</b>  | >0.05   | <b>1.235 [-0.189 3.609]</b> | <b>1.062 [-0.270 2.185]</b>  | >0.05   |
| kurtosis                                                         | 2.469 [-0.693 15.99]        | 1.344 [-0.655 9.091]         | <0.05   | <b>3.678 [-0.472 20.89]</b> | <b>2.181 [-0.731 9.272]</b>  | >0.05   |
| IQR                                                              | 0.432 [0.161 1.665]         | 0.272 [0.126 0.783]          | <0.001  | <b>0.385 [0.237 0.754]</b>  | <b>0.330 [0.198 0.689]</b>   | >0.05   |
| Whole-tumor D histogram (x10 <sup>-3</sup> mm <sup>2</sup> /s)   |                             |                              |         |                             |                              |         |
| 5 <sup>th</sup> percentile                                       | 0.461 [0 0.773]             | 0.637 [0.436 0.886]          | <0.001  | 0.475 [0.276 0.853]         | 0.610 [0.461 0.975]          | <0.005  |
| mean                                                             | 0.740 [0.445 1.249]         | 0.846 [0.674 1.263]          | <0.005  | <b>0.780 [0.555 1.559]</b>  | <b>0.877 [0.652 1.676]</b>   | >0.05   |
| median                                                           | 0.730 [0.402 1.317]         | 0.821 [0.628 1.327]          | <0.05   | <b>0.752 [0.515 1.480]</b>  | <b>0.834 [0.627 1.581]</b>   | >0.05   |
| skewness                                                         | <b>0.491 [-0.734 2.866]</b> | <b>0.889 [-0.764 3.238]</b>  | >0.05   | <b>0.840 [-0.468 2.368]</b> | <b>1.037 [0.276 1.974]</b>   | >0.05   |
| kurtosis                                                         | <b>1.367 [-0.701 13.72]</b> | <b>1.771 [-0.939 14.49]</b>  | >0.05   | <b>2.068 [-0.662 7.486]</b> | <b>1.675 [-0.944 5.579]</b>  | >0.05   |
| IQR                                                              | 0.230 [0.121 0.437]         | 0.182 [0.067 0.550]          | <0.005  | <b>0.254 [0.136 0.726]</b>  | <b>0.254 [0.138 0.691]</b>   | >0.05   |
| Whole-tumor f histogram                                          |                             |                              |         |                             |                              |         |
| 5 <sup>th</sup> percentile                                       | <b>0.019 [0.010 0.099]</b>  | <b>0.014 [0.010 0.065]</b>   | >0.05   | <b>0.017 [0.010 0.097]</b>  | <b>0.010 [0.010 0.014]</b>   | >0.05   |
| mean                                                             | 0.154 [0.023 0.280]         | 0.086 [0.047 0.159]          | <0.001  | 0.146 [0.08 0.258]          | 0.086 [0.046 0.145]          | <0.001  |
| median                                                           | 0.142 [0.010 0.227]         | 0.080 [0.014 0.169]          | <0.001  | 0.137 [0.031 0.248]         | 0.079 [0.026 0.148]          | <0.001  |
| skewness                                                         | <b>0.625 [-0.202 4.333]</b> | <b>0.514 [-0.380 2.484]</b>  | >0.05   | <b>0.537 [-0.142 1.607]</b> | <b>0.565 [-0.404 1.317]</b>  | >0.05   |
| kurtosis                                                         | <b>0.493 [-1.142 19.62]</b> | <b>-0.184 [-1.446 5.522]</b> | >0.05   | <b>0.027 [-0.801 2.251]</b> | <b>-0.005 [-1.036 3.140]</b> | >0.05   |
| IQR                                                              | 0.149 [0 0.372]             | 0.087 [0.034 0.177]          | <0.001  | 0.146 [0.093 0.240]         | 0.094 [0.061 0.153]          | <0.001  |

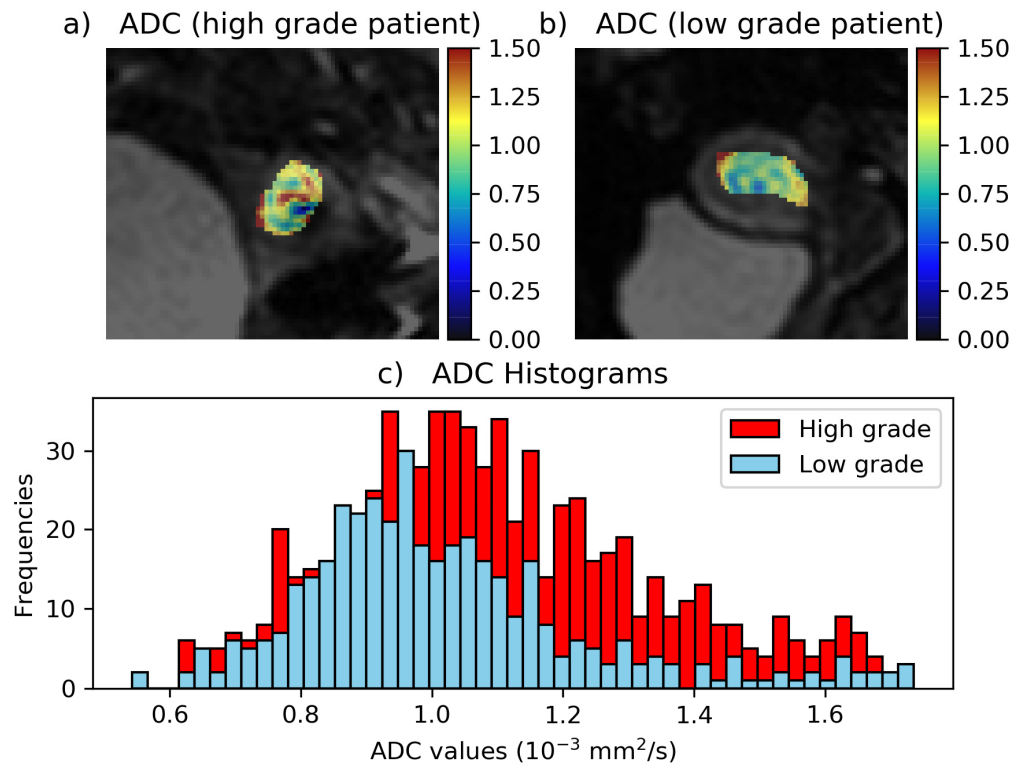

**Figure S2.** a) and b) Single DWI slice superimposed with a parametric map of ADC depicting ROI from a high- and a low-grade patient, respectively. c) Whole-tumor histograms obtained from the low-grade patient (blue color) and the high-grade patient (red color).

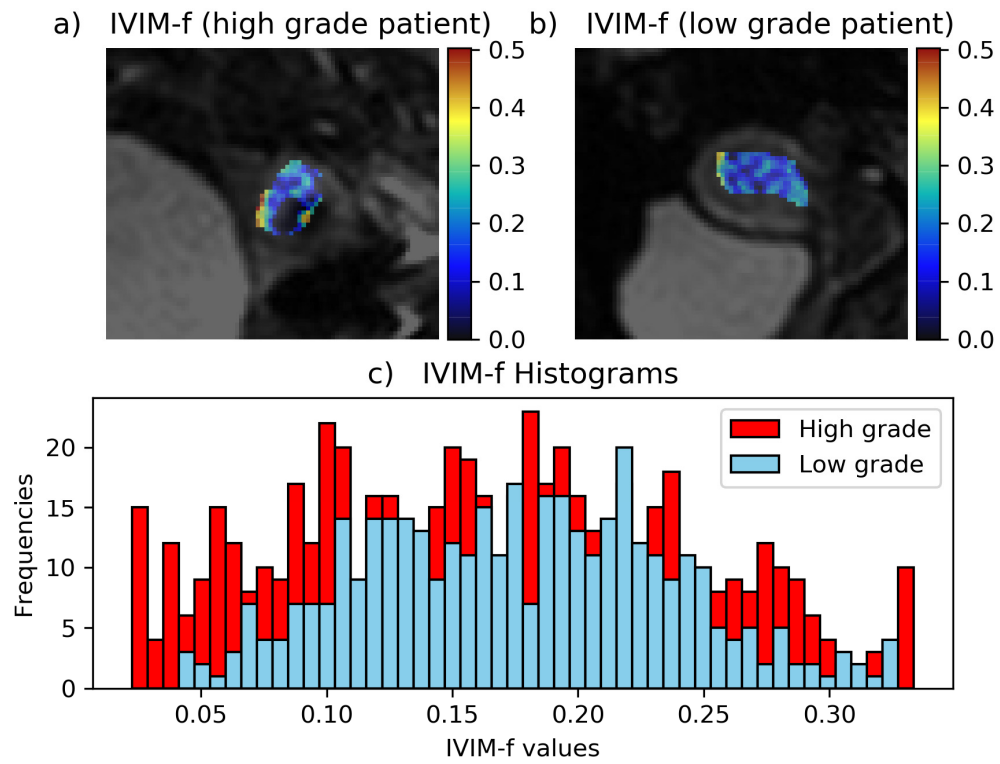

**Figure S3.** a) and b) Single DWI slice superimposed with a parametric map of  $f$  depicting ROI from a high- and a low-grade patient, respectively. c) Whole-tumor histograms obtained from the low-grade patient (blue color) and the high-grade patient (red color).
